# Supplementary material
Source: MDPI journal article supplement (https://www.mdpi.com/2073-4344/13/2/253)
Supplement: s1 [file s1 › catalysts-2099124-supplementary.pdf]

# Titanium Carbide Composite Hollow Cobalt Sulfide Heterojunction with Function of Promoting Electron Migration for Efficiency Photo-Assisted Electro-Fenton Cathode

Fengjiang Chen, Fan Yang \*, Sai Che, Hongchen Liu, Neng Chen, Zhijie Wu and Yongfeng Li \*

State Key Laboratory of Heavy Oil Processing, China University of Petroleum,  
Beijing 102249, China

\* Correspondence: yangfan@cup.edu.cn (F.Y.); yfli@cup.edu.cn (Y.L.)

## Text S1

The ORR performance was evaluated on a standard three electrode system on CHI760E (CH instruments, USA). All tests were performed in 0.1 M KOH and 0.1 M Na<sub>2</sub>SO<sub>4</sub>. The working electrodes were prepared as following steps: the catalyst ink was first prepared by dispersing 5 mg catalyst and 50  $\mu$ L Nafion in 200  $\mu$ L ethanol solution

and 200  $\mu\text{L}$  deionized water with sonication. Then 15.5  $\mu\text{L}$  of the catalyst ink was drop cast onto the rotating disk electrode (Pine, USA). Cyclic voltammetry (CV) was performed separately on the disk and the ring between -1.6 V and 0.5 V vs SCE at 50 mV/s and 0 rpm in  $\text{O}_2$ -saturated electrolyte. RRDE voltammograms of Fig. 5 were recorded by performing LSV on the disk from -1 V to 0.2 V vs. SCE at 50 mV/s and different rotation rates (400, 625, 900, 1225, and 1600 rpm). To record RRDE voltammograms in  $\text{O}_2$ -saturated electrolyte, LSV of the catalyst -casted disk was swept in positive direction from -1 V to 0.2 V vs. SCE. meanwhile the Pt ring was held at 1.48 V vs. RHE.

The Koutecki-Levich (K-L) equation (Eq. 1-2) was used to calculate electron transfer number ( $n$ ) based on the LSVs at various rotation speed of RDE.

$$\frac{1}{J} = \frac{1}{J_K} + \frac{1}{J_L} = nFkc_0 + \frac{1}{B\omega^{\frac{1}{2}}} \quad (1)$$

$$B = 0.62nFC_o(D_o)^{\frac{2}{3}}\nu^{-\frac{1}{6}} \quad (2)$$

where  $J$  is the measured current density of the working electrode,  $\omega$  is the angular velocity of the rotating electrode,  $J_K$  and  $J_L$  are the kinetic and diffusion limiting current densities,  $F$  is the Faraday constant (96485 C/mol),  $n$  is the electron transfer number during ORR process,  $\omega$  ( $\text{s}^{-1}$ ) is rotation rate,  $\nu$  ( $1.0 \times 10^{-2} \text{ cm}^2/\text{s}$ ) is the kinematic viscosity of the 0.1 M KOH solution,  $D_o$  and  $C_o$  are the diffusivity and solubility of oxygen in 0.1 M KOH solution, respectively. The ORR activity and selectivity were investigated by polarization curves and rotating ring-disk electrode measurements in  $\text{O}_2$  saturated electrolyte at a scan rate of 50 mV/s.

The  $\text{H}_2\text{O}_2$  selectivity ( $p$ ) and the electron transfer number ( $n$ ) is calculated using the following equations:

$$p = 2 \times \frac{\frac{i_{ring}}{N}}{i_{disk} + \frac{i_{ring}}{N}} \quad (3)$$

$$n = 4 \times \frac{i_{disk}}{i_{disk} + \frac{i_{ring}}{N}} \quad (4)$$

where  $i_{disk}$  and  $i_{ring}$  are the disk and the ring current, respectively, and  $N$  is the collection efficiency determined.

## Text S2

**Characterizations:** Scanning electron microscopy (SEM, Hitachi, SU8010), Transmission electron microscope and energy dispersive spectroscopy (TEM, FEI, Tecnai G2 F20), X-ray diffraction (XRD) were performed by the Bruker D8 Advance diffractometer with Cu K $\alpha$  radiation source. X-ray photoelectron spectroscopy (XPS) was measured with the Thermo ESCALAB 250XI. The electrochemical property of electrochemical impedance spectroscopy (EIS), Linear-sweep voltammetry (LSV) and chronoamperometry was performed with CHI 760D electrochemical workstation (CH Instruments, Inc., Shanghai) integrated with a three-electrode system. Electron paramagnetic resonance (EPR, Bruker, A300) tests for reactive species detection were performed by employing DMPO as the spin trapping agents.

**Preparation of CoS<sub>2</sub>/CoS/Ti<sub>3</sub>C<sub>2</sub> cathode:** A catalyst ink was prepared by mixing 25 mg CoS<sub>2</sub>/CoS/Ti<sub>3</sub>C<sub>2</sub> with 200  $\mu$ L ethanol, 200  $\mu$ L deionized water and 50  $\mu$ L PTEF after ultrasonic treatment for 30 min. Then, the ink was dipcoated onto carbon cloth (CC) (working area of 5 cm<sup>2</sup>) and dried at 60°C to prepare CoS<sub>2</sub>/CoS/Ti<sub>3</sub>C<sub>2</sub> cathode. Similarly, CoS, CoS<sub>2</sub>, CoS<sub>2</sub>/CoS cathode were obtained in the same way.

**Experimental procedure:** All typical experiments were carried out in a cylindrical single electrolytic cell. The 500 W Xe lamp was introduced as light source, and SMT

in 0.1 M Na<sub>2</sub>SO<sub>4</sub> solution was served as the pollutants. Oxygen was kept flowing into the solution throughout the degradation process at a flow rate of 60 mL/min. The CoS<sub>2</sub>/CoS/Ti<sub>3</sub>C<sub>2</sub>/CC worked as the cathode. 1 mL sample solution were taken at set intervals using an organic filter. The micro-pollutants concentration during the degradation was measured by High Performance Liquid Chromatography (HPLC) (LC-10ADVP, Shimadzu) equipped with a C18 column (2.1×150 mm, particles size 1.9μm). The mobile phase of SMT was a mixture of 0.1% formic acid solution (A) and acetonitrile (B) and the ratio was 4:1. The injection volume of the sample was 10 μL and the flow rate was 0.5 mL/min. The degradation intermediates of sulfadiazine were identified by the QTOF LC/MS (UPLC-M-QTOF).

**Table S1 the percentages of various atoms in CoS<sub>2</sub>/CoS/Ti<sub>3</sub>C<sub>2</sub>**

| Name | Start BE | Peak BE | End BE | Height CPS | FWHM eV | Area (N) TPP-2M | Atomic % |
|------|----------|---------|--------|------------|---------|-----------------|----------|
| C1s  | 297.98   | 284.48  | 279.18 | 26923.25   | 2.92    | 1224.48         | 51.73    |
| Co2p | 811.98   | 778.25  | 771.18 | 37442.33   | 2.39    | 320.47          | 13.54    |

|      |        |        |        |          |      |        |       |
|------|--------|--------|--------|----------|------|--------|-------|
| S2p  | 174.98 | 161.66 | 157.18 | 21450.12 | 2.89 | 762.81 | 32.23 |
| Ti2p | 474.98 | 458.45 | 448.18 | 7407.63  | 1.27 | 59.22  | 2.5   |

**Table S2 the percentages of various bonds in CoS<sub>2</sub>/CoS/Ti<sub>3</sub>C<sub>2</sub>**

| name        | Ti 2p |       |       | S 2p  |                              |                 |                 | Co 2p                        |                  |       |                  |                  |
|-------------|-------|-------|-------|-------|------------------------------|-----------------|-----------------|------------------------------|------------------|-------|------------------|------------------|
| bonds       | Ti-C  | Ti-O  | Ti-O  | Ti-F  | S <sub>2</sub> <sup>2-</sup> | S <sup>2-</sup> | S <sup>6+</sup> | S <sub>2</sub> <sup>2-</sup> | Co <sup>2+</sup> | Sat.  | Co <sup>3+</sup> | Co <sup>2+</sup> |
|             |       | 2p3/2 | 2p1/2 |       | 2p3/2                        | 2p3/2           |                 | 2p1/2                        | 2p3/2            |       | 2p1/2            | 2p1/2            |
| percentages | 21.8% | 29.2% | 35.6% | 13.4% | 39.2%                        | 15.7%           | 34.0%           | 11.1%                        | 37.0%            | 41.5% | 11.0%            | 10.5%            |

**Table S3 performance comparisons of similar research**

| catalyst/cathode                                    | electrode<br>area  | initial<br>pH | Potential/<br>current  | Target<br>pollutant   | reaction<br>speed | Catalyst<br>loading  | Ref. |
|-----------------------------------------------------|--------------------|---------------|------------------------|-----------------------|-------------------|----------------------|------|
| CFP@PANI@<br>MIL-101                                | 2 cm <sup>2</sup>  | 3             | 5 mA/cm <sup>2</sup>   | dimethyl<br>phthalate | 0.031             | ---                  | [12] |
| CFP@CoFe <sub>2</sub> O <sub>4</sub>                | 2 cm <sup>2</sup>  | 3             | 5 mA/cm <sup>2</sup>   | p-nitrophenol         | 0.035             | ---                  | [13] |
| B@Ni-F/Fe <sup>2+</sup>                             | 2 cm <sup>2</sup>  | 3             | 10 mA/cm <sup>2</sup>  | sulfamerazin<br>e     | 0.002             | ---                  | [47] |
| Fe <sub>3</sub> O <sub>4</sub> /N-rGO               | 7 cm <sup>2</sup>  | 3             | 9 mA/cm <sup>2</sup>   | Bisphenol A           | 0.029             | ---                  | [48] |
| F-BPC                                               | 40 cm <sup>2</sup> | 5             | 7.5 mA/cm <sup>2</sup> | sulfathiazole         | 0.02              | 1 g/L                | [49] |
| CMIL-<br>NH <sub>2</sub> @PCMs                      | 5 cm <sup>2</sup>  | 7             | -0.14 V                | napropamide           | 0.028             | ---                  | [50] |
| FeS <sub>2</sub> NWs/Ti <sub>3</sub> C <sub>2</sub> | 5 cm <sup>2</sup>  | 3             | 200 mA                 | sulfamerazin<br>e     | 0.046             | 7 mg/cm <sup>2</sup> | [28] |

|                                                      |                   |   |                       |                   |       |                      |           |
|------------------------------------------------------|-------------------|---|-----------------------|-------------------|-------|----------------------|-----------|
| Pd-Ti/TiO <sub>2</sub> NTs                           | ---               | 7 | 20 mA                 | Trichloroethylene | 0.019 | ---                  | [51]      |
| CoS <sub>2</sub> /CoS/Ti <sub>3</sub> C <sub>2</sub> | 5 cm <sup>2</sup> | 3 | 20 mA/cm <sup>2</sup> | sulfamerazine     | 0.031 | 5 mg/cm <sup>2</sup> | This work |

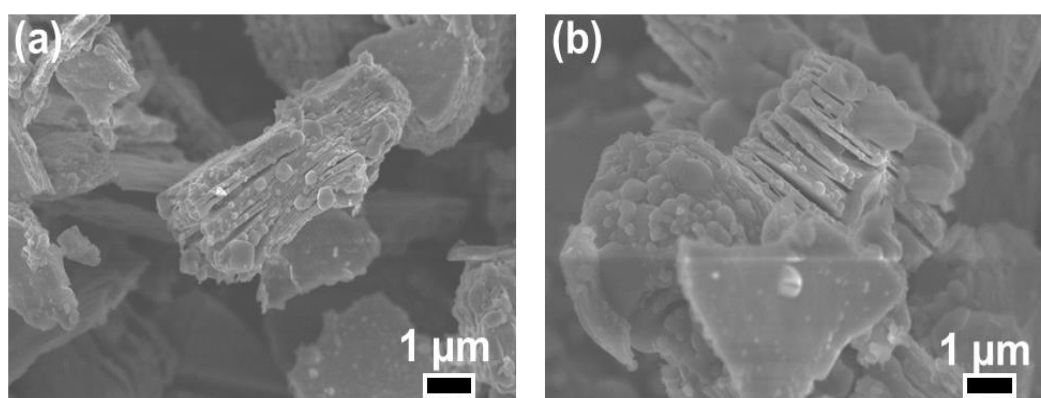

**Figure S1.** Morphology of Ti<sub>3</sub>C<sub>2</sub> sample before etching with hydrofluoric acid.

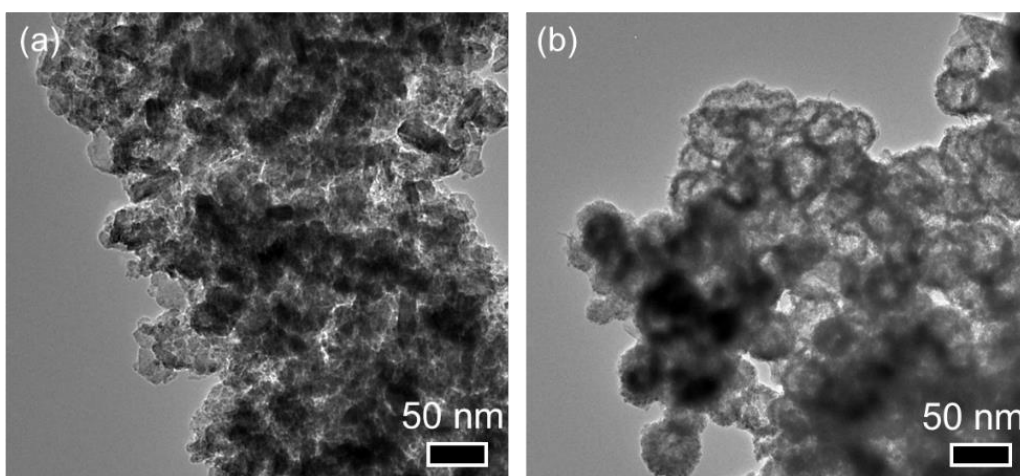

**Figure S2.** TEM of (a) CoS<sub>2</sub>/CoS (b) CoS<sub>2</sub>/CoS/Ti<sub>3</sub>C<sub>2</sub>.

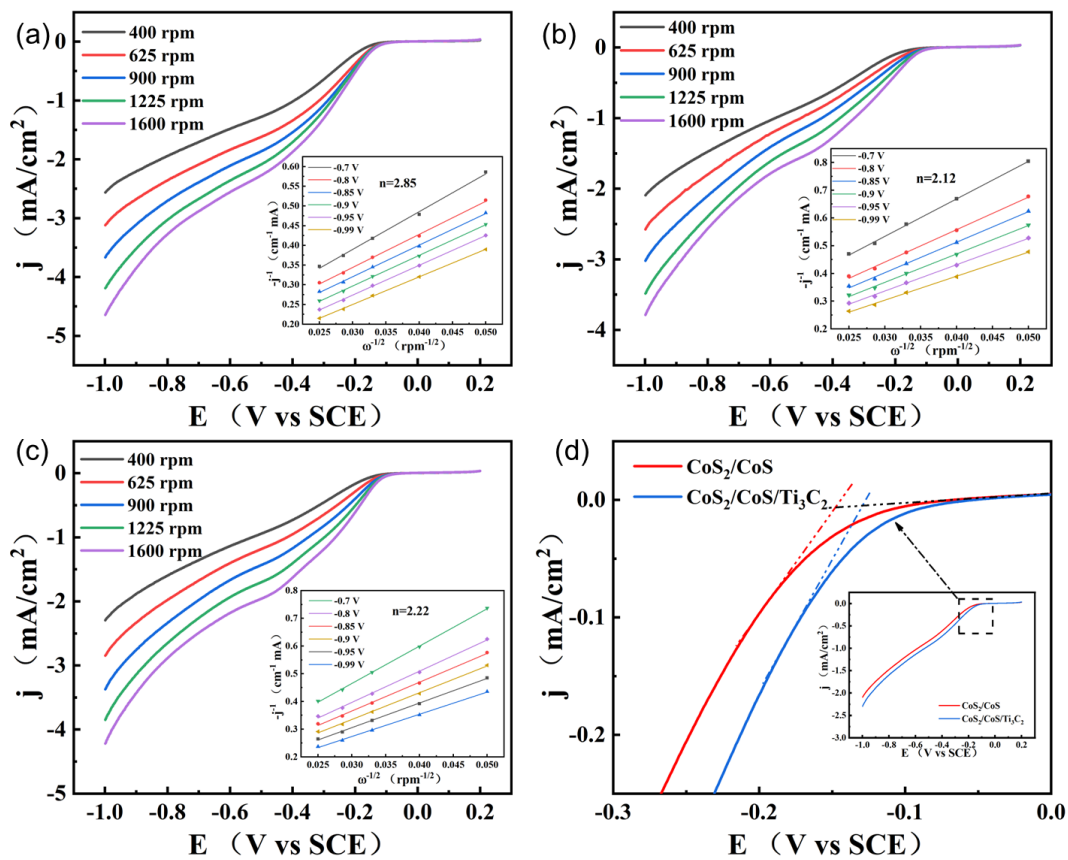

**Figure S3.** LSVs of (a)  $\text{CoS}_2$ , (b)  $\text{CoS}_2/\text{CoS}$ , (c)  $\text{CoS}_2/\text{CoS}/\text{Ti}_3\text{C}_2$  performed with RDE test in  $\text{O}_2$ -saturated ( $697 \mu\text{g}/\text{cm}^2$ ) and the corresponding K-L curves (inset), (d) LSVs of  $\text{CoS}_2/\text{CoS}$  and  $\text{CoS}_2/\text{CoS}/\text{Ti}_3\text{C}_2$ .

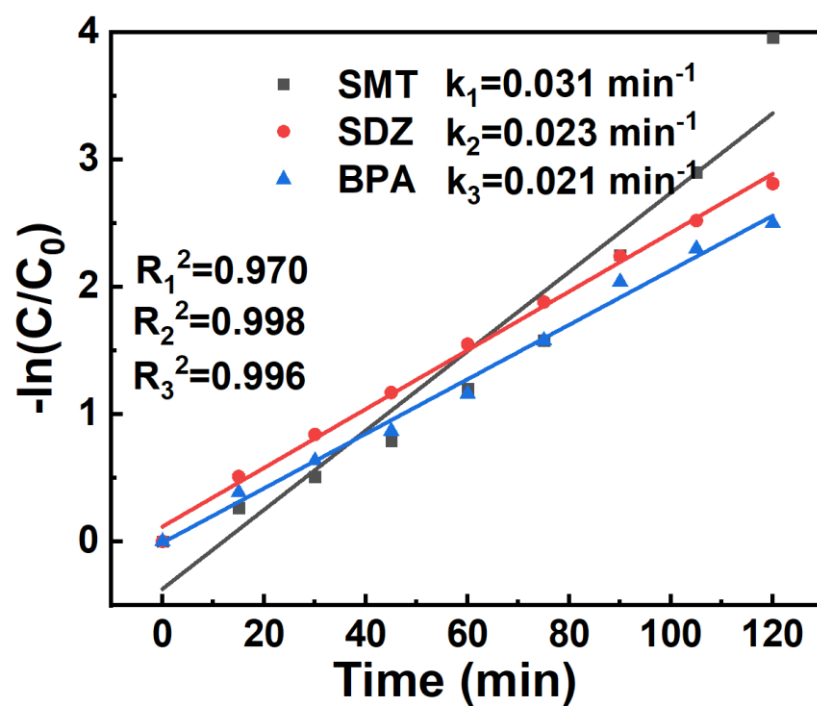

**Figure S4.** Pseudo first order reaction rate of different substrates in  $\text{CoS}_2/\text{CoS}/\text{Ti}_3\text{C}_2$  cathode system.

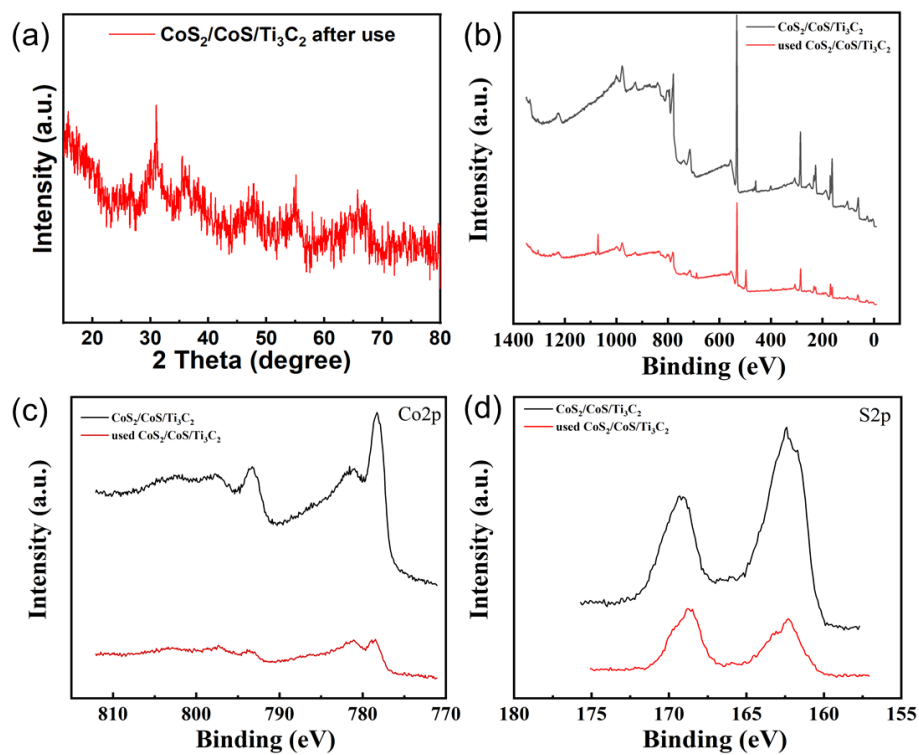

**Figure S5.** (a) XRD pattern and (b-d) XPS of used  $\text{CoS}_2/\text{CoS}/\text{Ti}_3\text{C}_2$  catalyst.

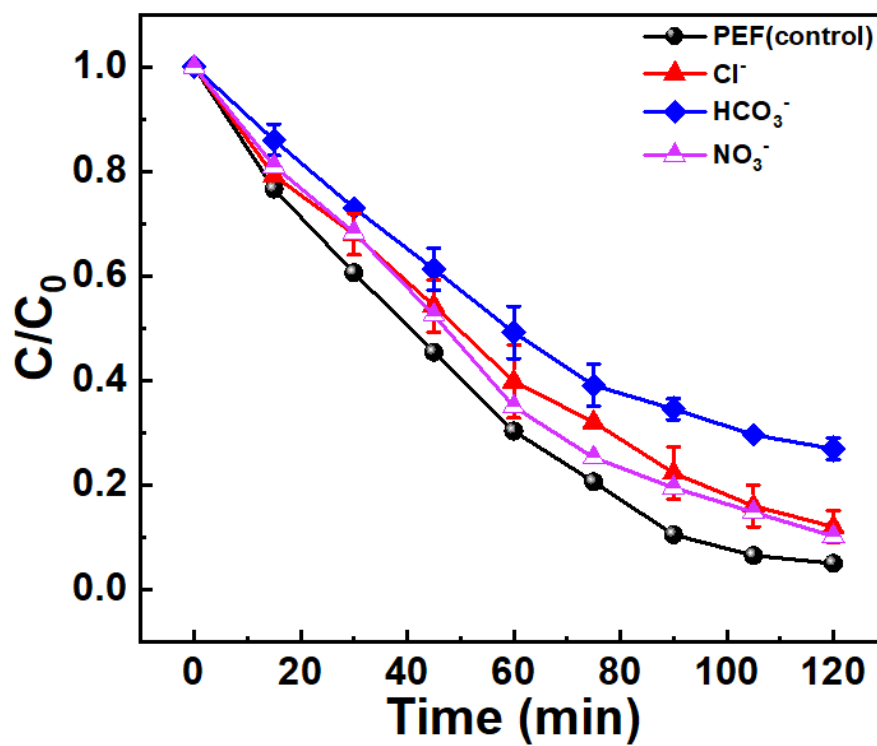

**Figure S6.** Resistance to ion interference of  $CoS_2/CoS/Ti_3C_2$  cathode
